# Supplementary material for: Engineering seed microenvironment with embedded bacteriophages and plant growth promoting rhizobacteria
Source: PubMed Central journal article supplement — BMC Microbiol. 2024 Nov 27;24:503. doi: 10.1186/s12866-024-03657-y (PMC11600732; doi:10.1186/s12866-024-03657-y), 2024-11-27
Supplement: 12866_2024_3657_MOESM1_ESM.pdf [file 12866_2024_3657_MOESM1_ESM.pdf]

1 **Figure S1.** Phylogenetic tree of *Pseudomonas lalkuanensis*

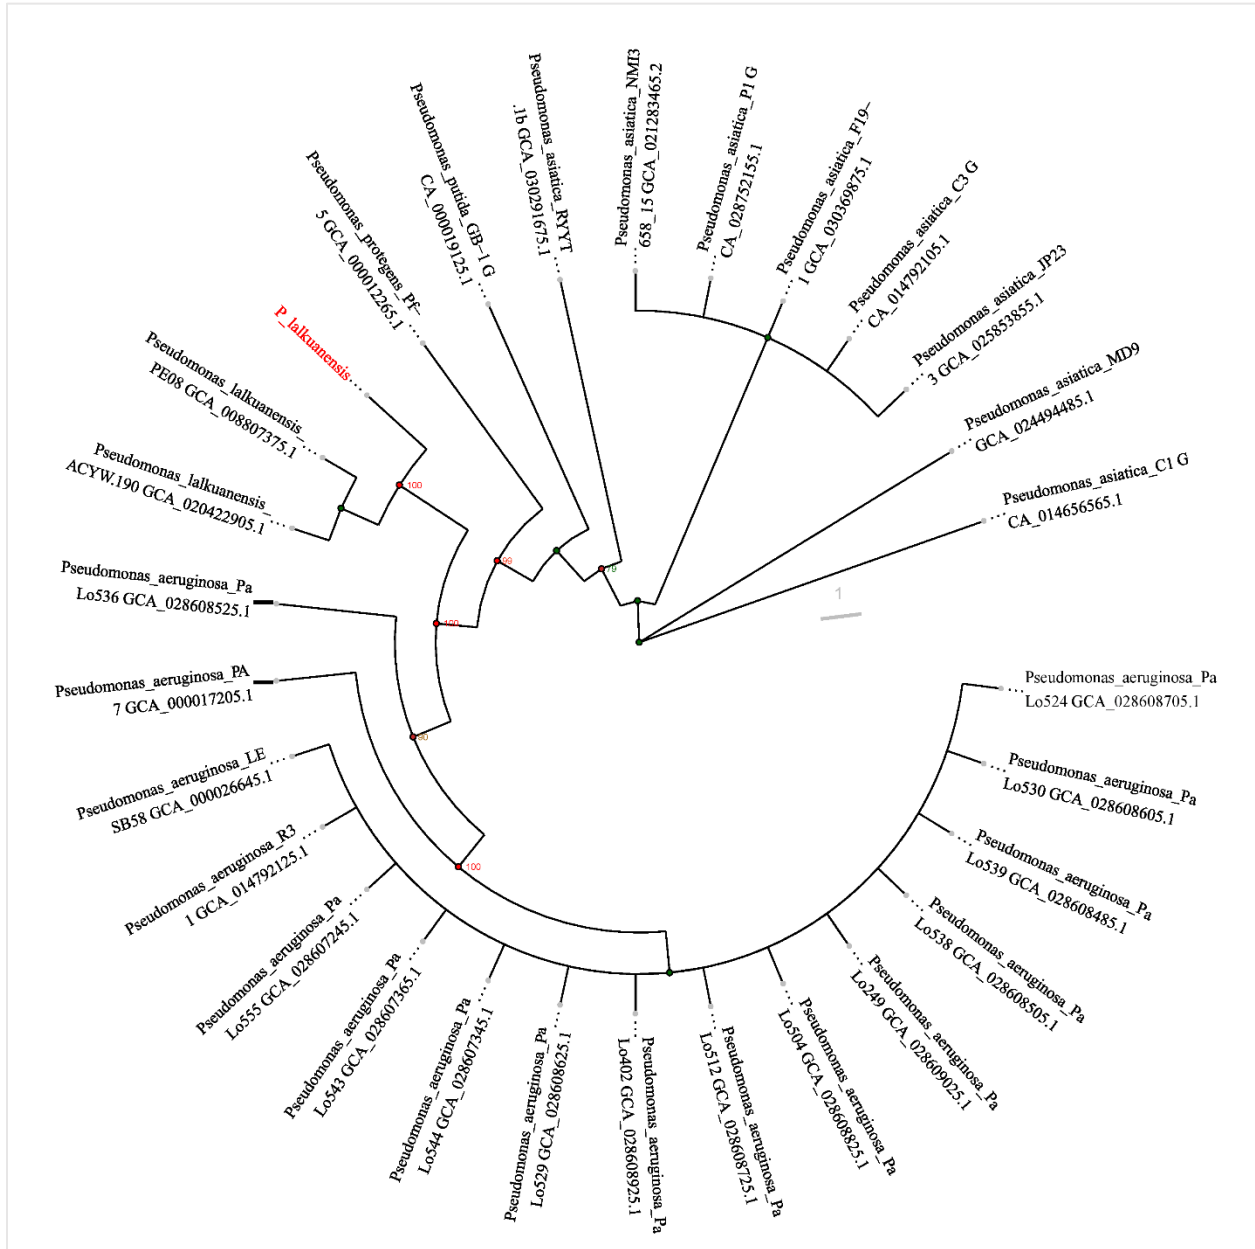

2

3 **Figure S2** Stability evaluation of *P. lalkuanensis* A101 and P-PSG11 in silk-trehalose films  
 4 preservation by P-PSG11 phage titer and A101 colony counting for 8 weeks.

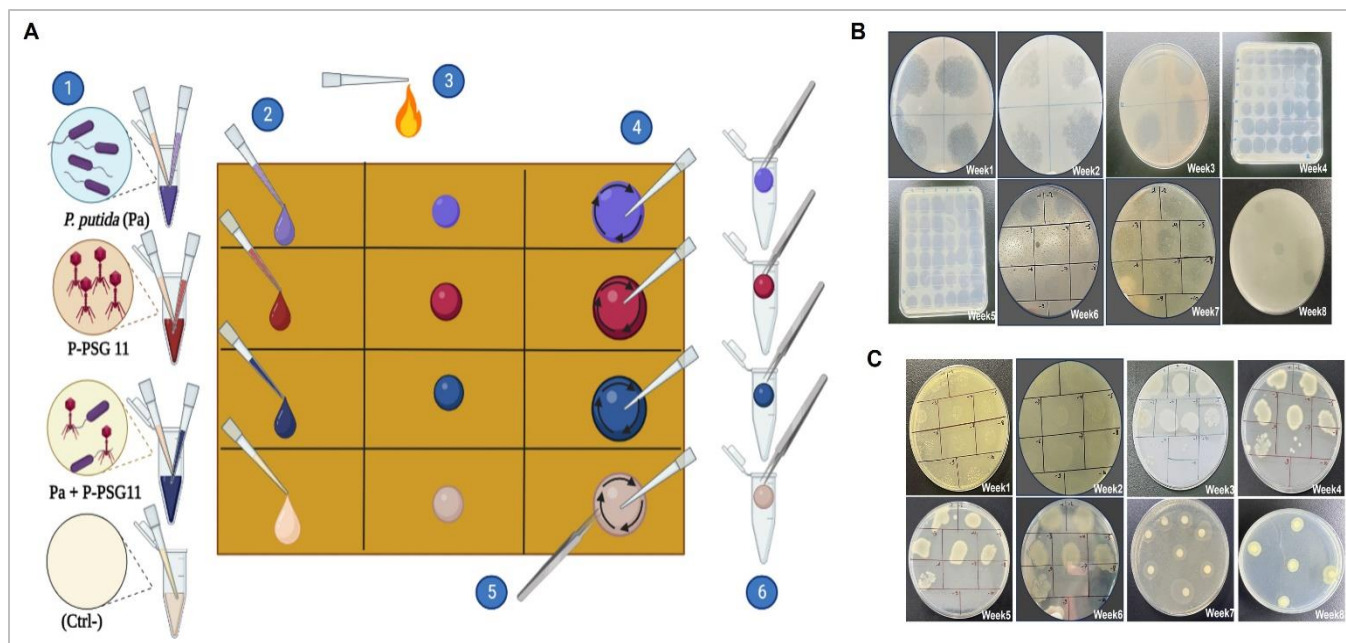

5  
6 **Figure. S3** Germination of potato seeds under seed coating conditions using Silk-  
7 trehalose and mixed with the biocontrol agents P-  
8 PSG11 phage and *P. lalkuanensis* bacteria at room temperature conditions.

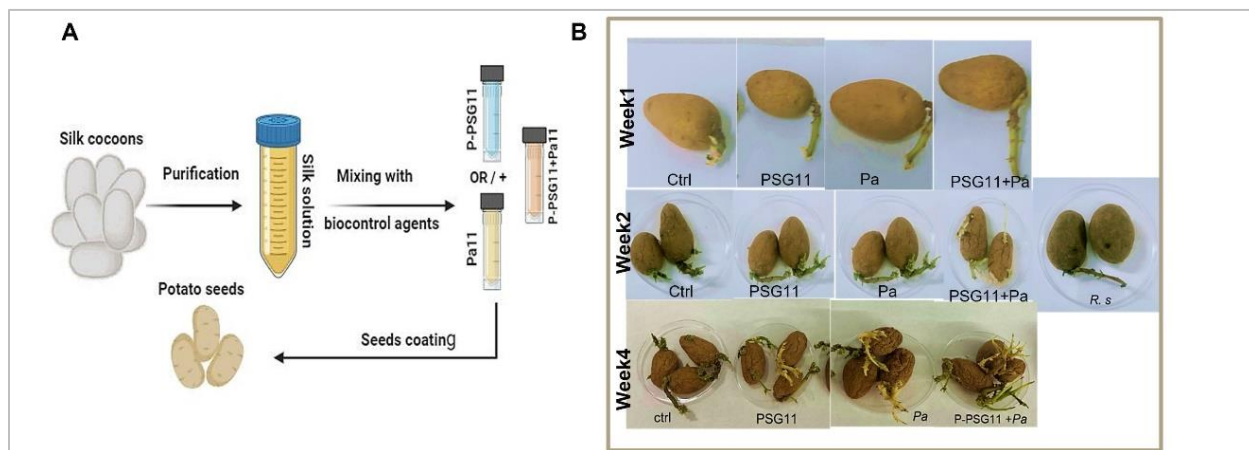

9  
10 **Table S1.** Some characteristics of the experimental soil and cattle manure (CM)

| Characteristics                             | Soil              |
|---------------------------------------------|-------------------|
| <u>Particle size distribution (%):</u>      |                   |
| Textural grade                              | Sand              |
| pH                                          | 8.05 <sup>†</sup> |
| EC <sub>e</sub> (dS m <sup>-1</sup> )       | 1.14              |
| <u>Soluble cations (meq l<sup>-1</sup>)</u> |                   |

|                                            |      |
|--------------------------------------------|------|
| Na <sup>+</sup>                            | 3.9  |
| K <sup>+</sup>                             | 1.56 |
| Ca <sup>2+</sup>                           | 21.1 |
| Mg <sup>2+</sup>                           | 9.2  |
| <u>Soluble anions (meq l<sup>-1</sup>)</u> |      |
| Cl <sup>-</sup>                            | 0.14 |
| HCO <sub>3</sub> <sup>-</sup>              | 2.18 |
| SO <sub>4</sub> <sup>2-</sup>              | 0.41 |
| CO <sub>3</sub> <sup>2-</sup>              | 0.00 |
| Organic C (g kg <sup>-1</sup> )            | 0.37 |
| Total N (g kg <sup>-1</sup> )              | 0.20 |
| Available N (mg kg <sup>-1</sup> )         | 1.28 |
| Available P (mg Kg <sup>-1</sup> )         | 3.1  |

11 † In soil-water suspension (1:2.5)

12 **Figure. S4** Evaluating for biocontrol and plant development by using A) The pot experiment  
 13 design, B) single phage (P-PSG11), *P. lalkuanensis* and phage + PGPR (PSG11+ *P. lalkuanensis*)  
 14 against *Ralstonia solanacearum*, C) single phage (P-PSG11), *P. lalkuanensis* and phage + PGPR  
 15 (PSG11+ *P. lalkuanensis*) preventing salinity stress (NaCl), comparing with D) the negative  
 16 controls in a pot experiment.

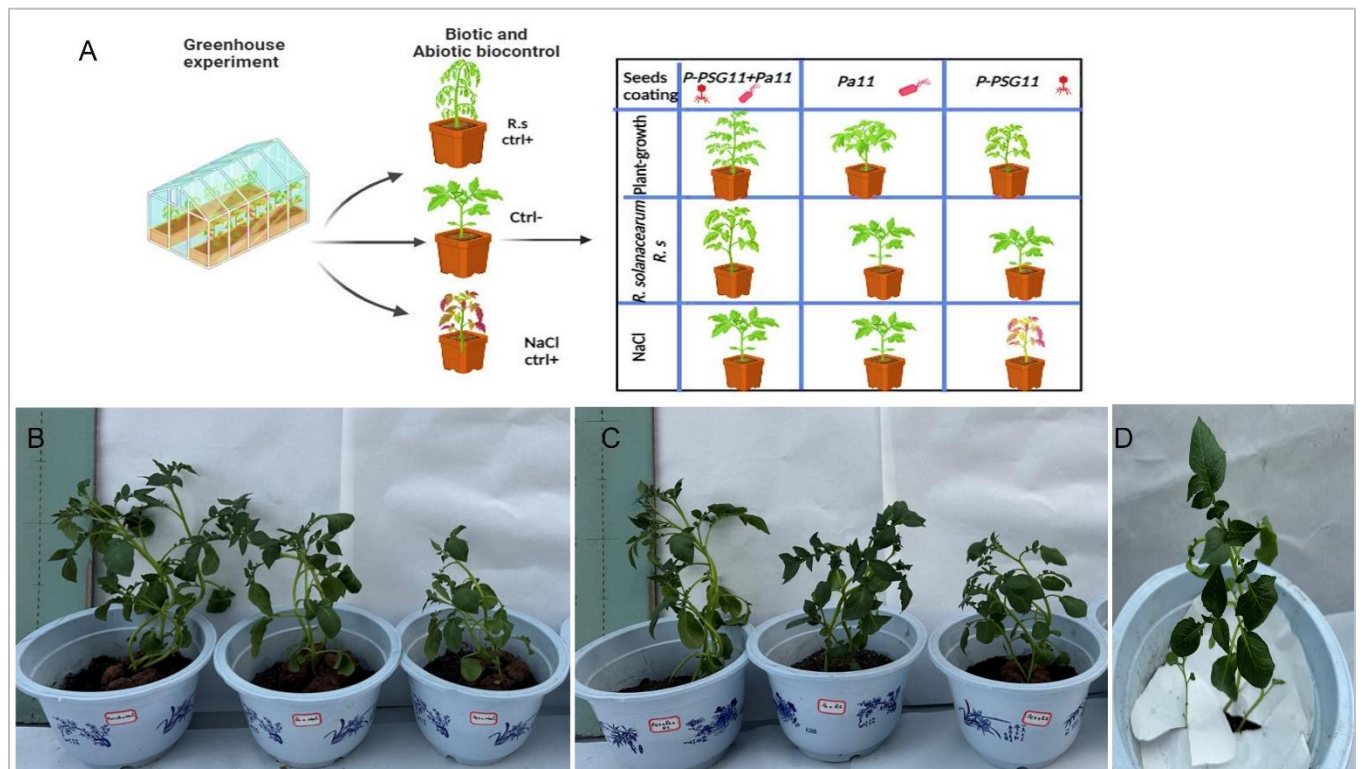

17
